# Supplementary material for: Molecularly imprinted polymers as effective capturing receptors in a pseudo-ELISA immunoassay for procalcitonin detection in veterinary species
Source: Royal Society of Chemistry journal article supplement (doi:10.1039/d2ay01175a), 2022-11-29
Supplement: d2ay01175a1.pdf [file d2ay01175a1.pdf]

## Supplementary material

### **Molecularly Imprinted Polymers as effective capturing receptors in a pseudo-ELISA Immunoassay for Procalcitonin detection in Veterinary Species.**

*Federica Battaglia<sup>\*a,b</sup>, Francesca Bonelli<sup>b</sup>, Micaela Sgorbini<sup>b</sup>, Luigi Intorre<sup>b</sup>, Maria Minunni<sup>a</sup>, Simona Scarano<sup>a</sup> and Valentina Meucci<sup>\*b</sup>*

<sup>a</sup>*Department of Chemistry “Ugo Schiff”, University of Florence, 50019 Sesto Fiorentino (FI), Italy*

<sup>b</sup>*Department of Veterinary Science, University of Pisa, 56122 Via Livornese (PI), Italy*

*\*Corresponding authors: [federica.battaglia@unifi.it](mailto:federica.battaglia@unifi.it), [valentina.meucci@unipi.it](mailto:valentina.meucci@unipi.it)*

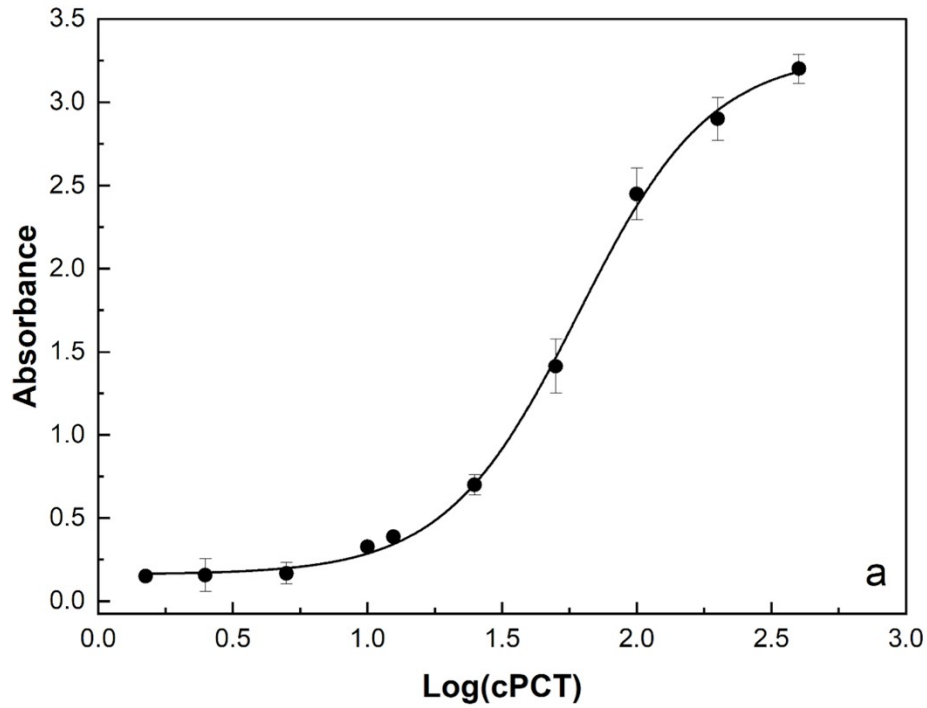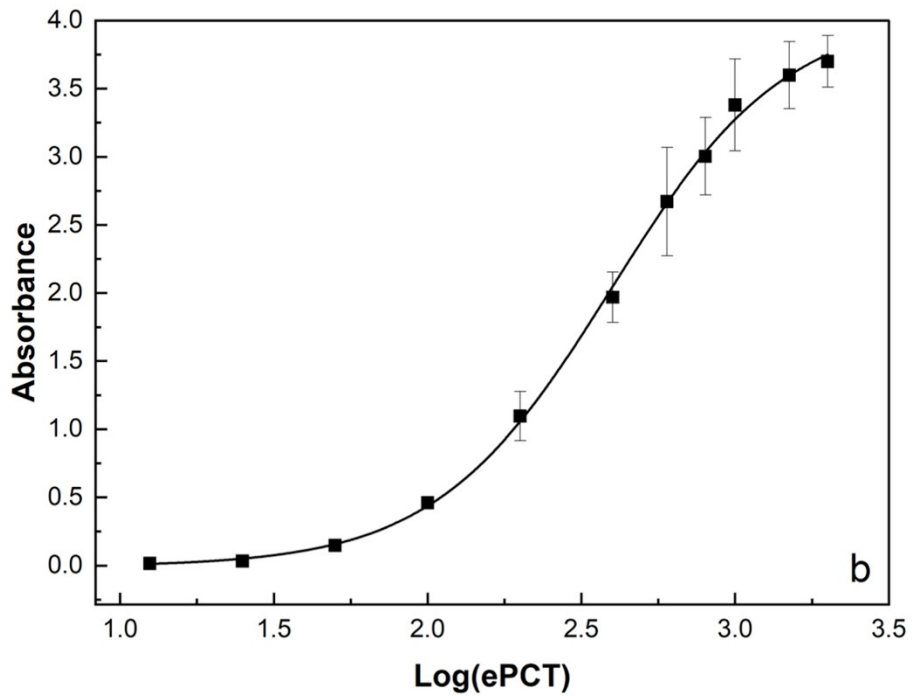

Figure S1 - Saturation curves performed for cPCT on cMIPs (a) and ePCT on eMIP (b) in buffer with the sandwich assay. The sigmoidal curve was obtained by plotting the absorbance against the logarithm of e/c PCT concentration tested and fitted with nonlinear regression dose response ( $R^2=0.999$  for both proteins). Each point is representative of three measurements (Abs  $\pm$  SD).
